# Supplementary material for: Enzyme-catalysed biodegradation of carbon dots follows sequential oxidation in a time dependent manner
Source: Royal Society of Chemistry journal article supplement (doi:10.1039/c9nr00194h), 2019-01-01
Supplement: c9nr00194h1.pdf [file c9nr00194h1.pdf]

## Supporting Information

### Enzyme-Catalysed Biodegradation of Carbon Dots follow Sequential Oxidation in a Time Dependent Manner

Indrajit Srivastava,<sup>#, φ, †</sup> Dinabandhu Sar,<sup>#, φ, †</sup> Prabuddha Mukherjee,<sup>#</sup> Aaron S. Schwartz-Duval,<sup>#, φ</sup> Zhaolu Huang,<sup>#, φ</sup> Camilo Jaramillo<sup>α, β</sup>, Ana Civantos<sup>α, β</sup>, Indu Tripathi,<sup>#, φ</sup> Jean Paul Allain<sup>α, β</sup>, Rohit Bhargava<sup>#, ς</sup> Dipanjan Pan<sup>\*, #, φ</sup>

<sup>#</sup> Departments of Bioengineering, Materials Science and Engineering, Beckman Institute for Advanced Science and Technology, and Cancer Center at Illinois, University of Illinois at Urbana-Champaign, Urbana, IL, 61801, USA

<sup>ς</sup> Departments of Chemistry, Electrical and Computer Engineering, and Chemical and Biomolecular Engineering, University of Illinois at Urbana-Champaign, Urbana, IL, 61801, USA

<sup>φ</sup> Mills Breast Cancer Institute, Carle Foundation Hospital, Urbana, IL, 61801, USA

<sup>α</sup> Department of Nuclear, Plasma and Radiological Engineering, University of Illinois at Urbana-Champaign, Urbana, IL, 62802, USA

<sup>β</sup> Micro and Nanotechnology Laboratory, University of Illinois at Urbana-Champaign, Urbana, IL, 62802, USA

<sup>†</sup> These authors contributed equally

Email: dipanjan@illinois.edu

| <b>S. No.</b> | <b>Table of content</b>                                  | <b>Pg. No.</b> |
|---------------|----------------------------------------------------------|----------------|
| 1.            | Physiochemical characterization of different CDs         | S3             |
| 2.            | Preliminary FT-IR measurement of CDs                     | S4             |
| 3.            | DLS measurement of degraded CDs                          | S5             |
| 4.            | Zeta potential measurement of degraded CDs               | S6             |
| 5.            | UV-Vis absorption spectra of degraded CDs                | S7             |
| 6.            | Normalized Excitation-Emission of CDs and degraded CDs   | S8-S11         |
| 7.            | XPS measurement of all CDs and degraded CDs              | S12            |
| 8.            | XPS narrow scan regions for CDs and degraded CDs         | S13-S17        |
| 9.            | MALDI-TOF spectra of lipase enzyme                       | S18            |
| 10.           | MALDI-TOF spectra of CDs and degraded CDs                | S19-S30        |
| 11.           | Table showing atomic percentages of CDs and degraded CDs | S31            |

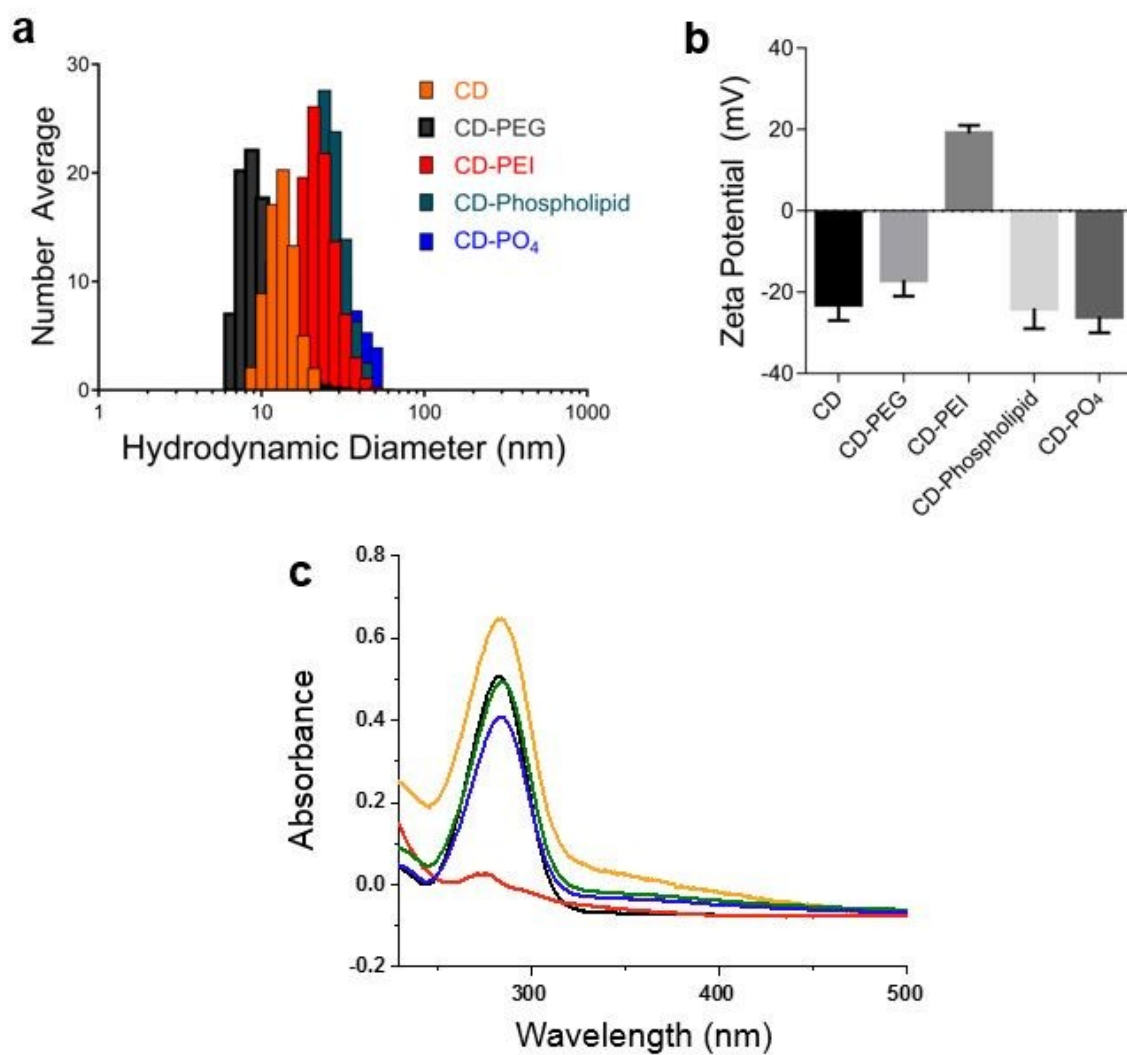

**Figure S1.** Physiochemical characterization of different CDs performed by (a) dynamic light scattering (DLS) to get their hydrodynamic diameters, (b) zeta potential measurements and (c) UV-Vis absorption spectra.

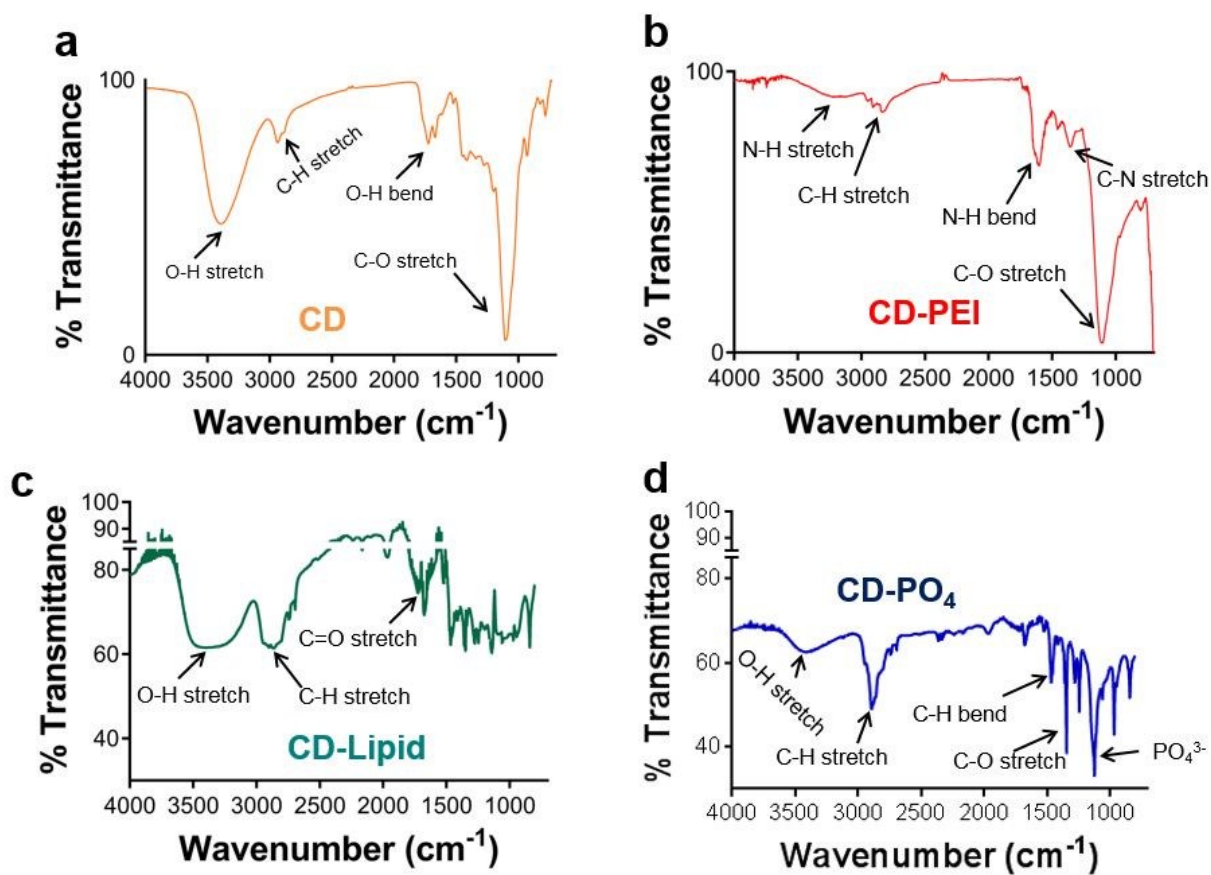

**Figure S2.** Preliminary Fourier-transform infrared spectroscopy (FT-IR) measurements performed on (a) CD, (b) CD-PEI, (c) CD-Lipid and (d) CD-PO<sub>4</sub> to gather insights into their chemical features.

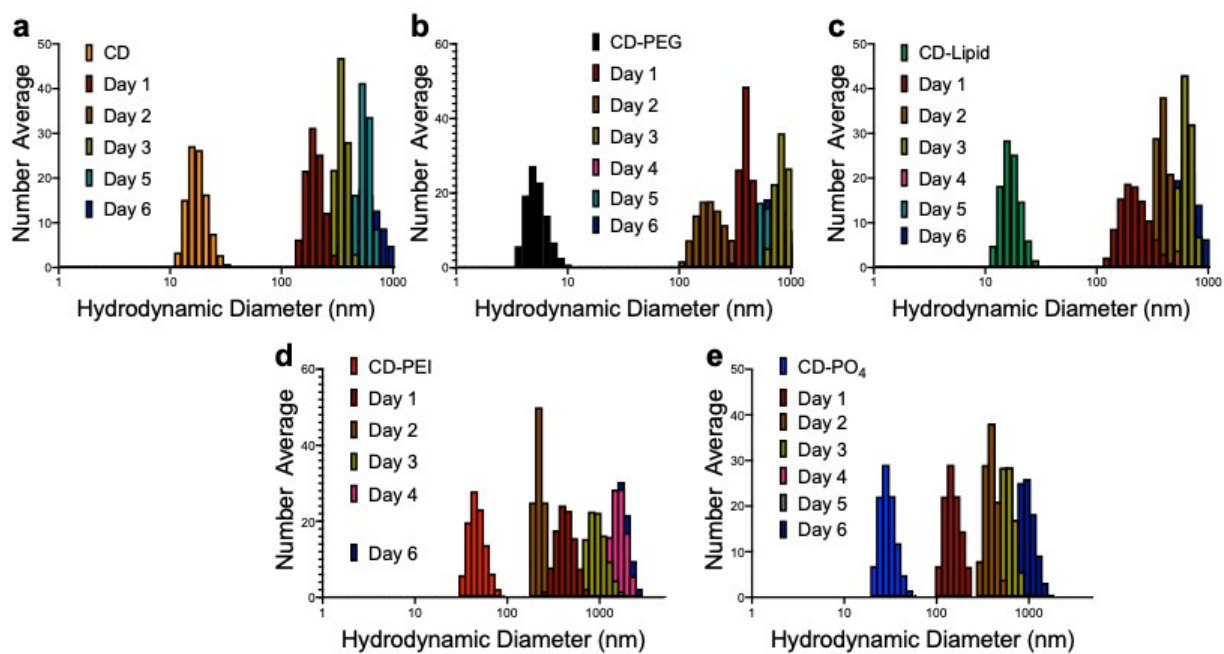

**Figure S3.** DLS measurements were collected for (a) CD, (b) CD-PEG, (c) CD-Lipid, (d) CD-PEI, and (e) CD-PO<sub>4</sub> during the 1 week in which it was subjected to lipase-mediated degradation.

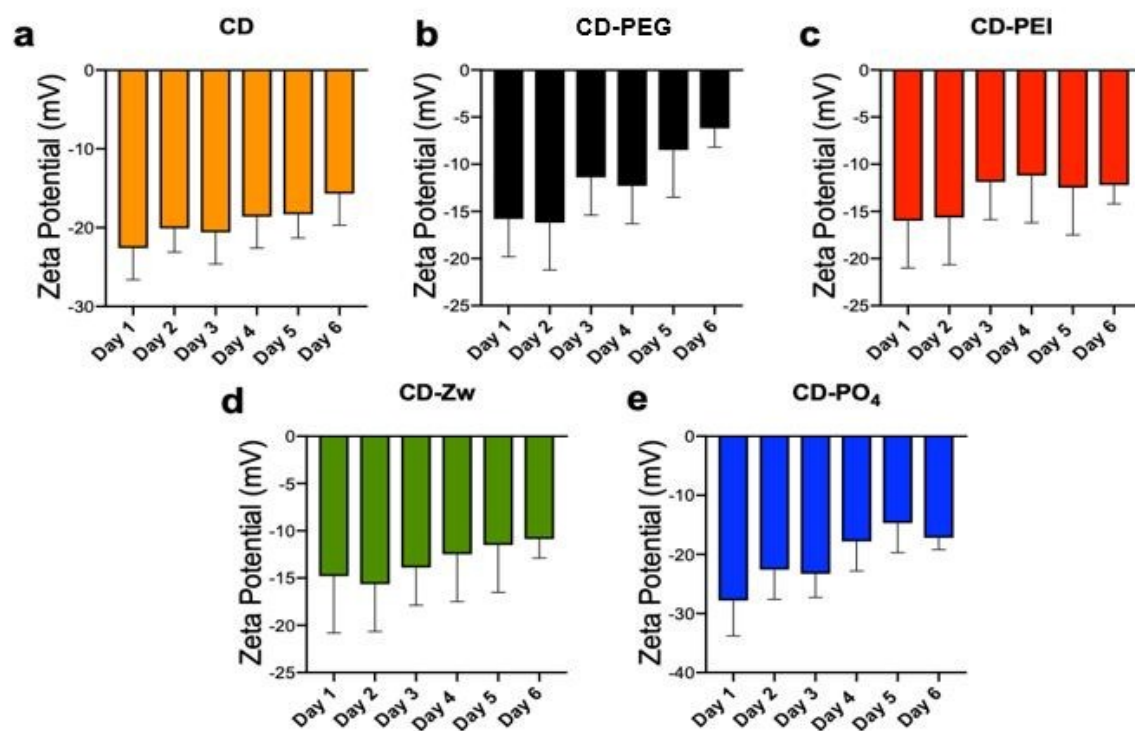

**Figure S4.** Zeta potential measurements were collected for (a) CD, (b) CD-PEG, (c) CD-Lipid, (d) CD-PEI, and (e) CD-PO<sub>4</sub> during the 1 week in which it was subjected to lipase-mediated degradation.

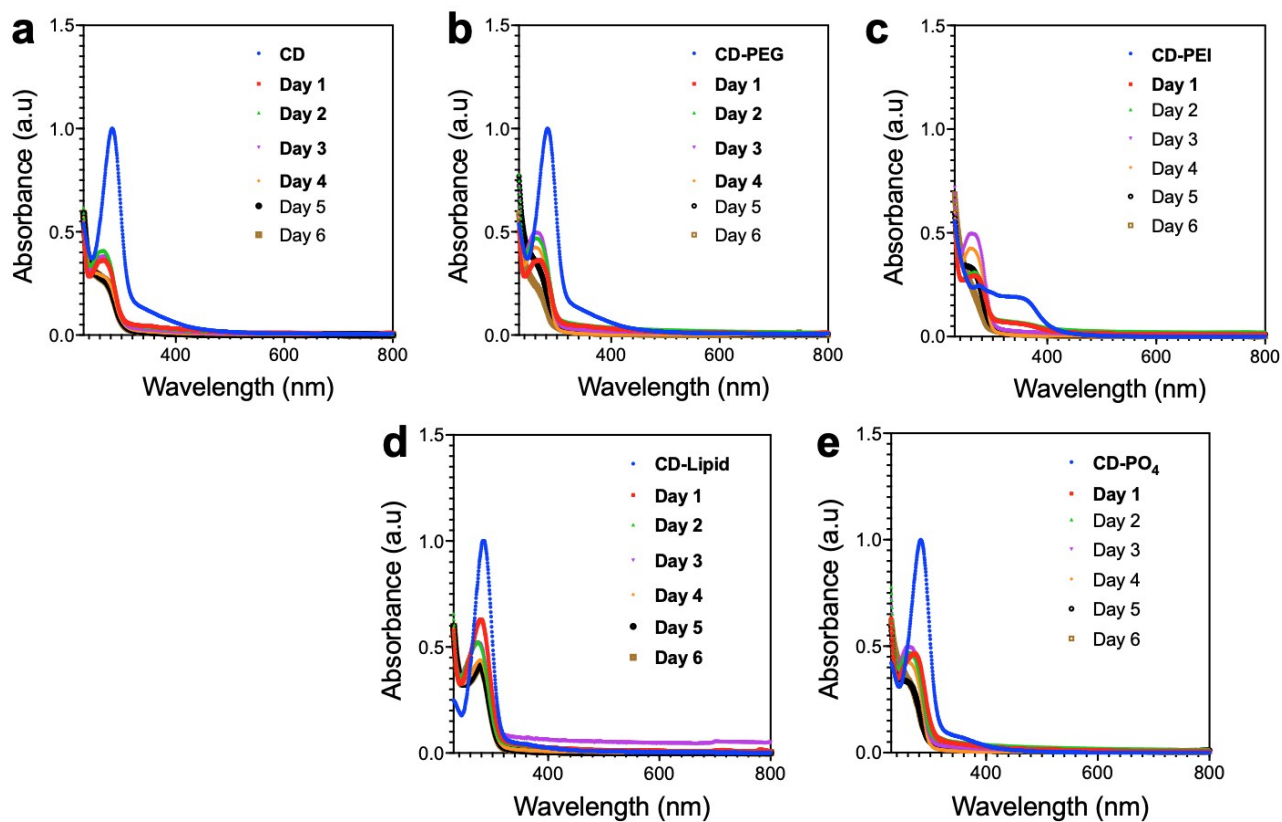

**Figure S5.** UV-Vis absorption spectra were collected for (a) CD, (b) CD-PEG, (c) CD-Lipid, (d) CD-PEI, and (e) CD-PO<sub>4</sub> during the 1 week in which it was subjected to lipase-mediated degradation.

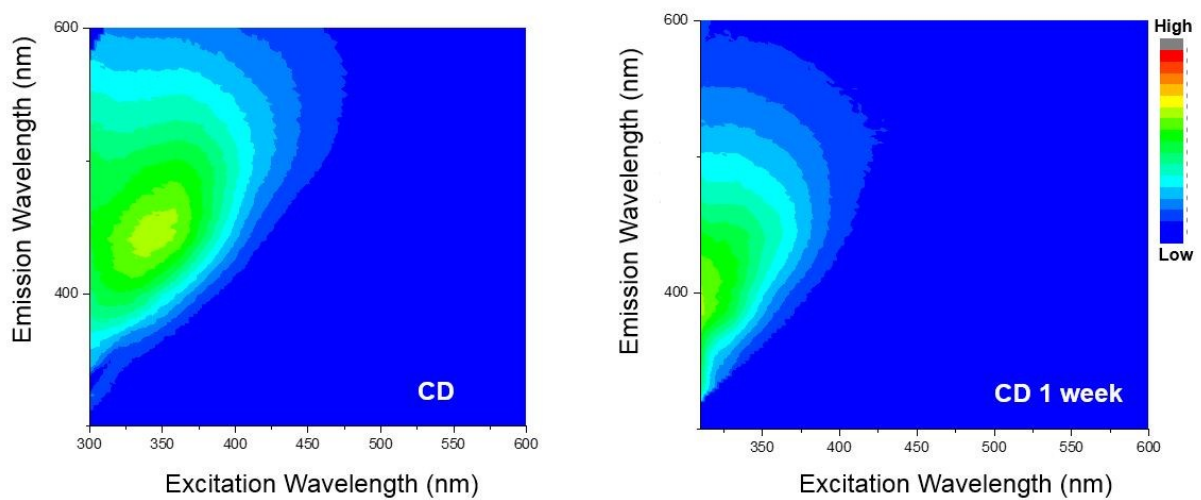

**Figure S6.** Normalized Excitation-Emission 2D contour for (a) CD and (b) CD degraded in presence of lipase for 1 week.



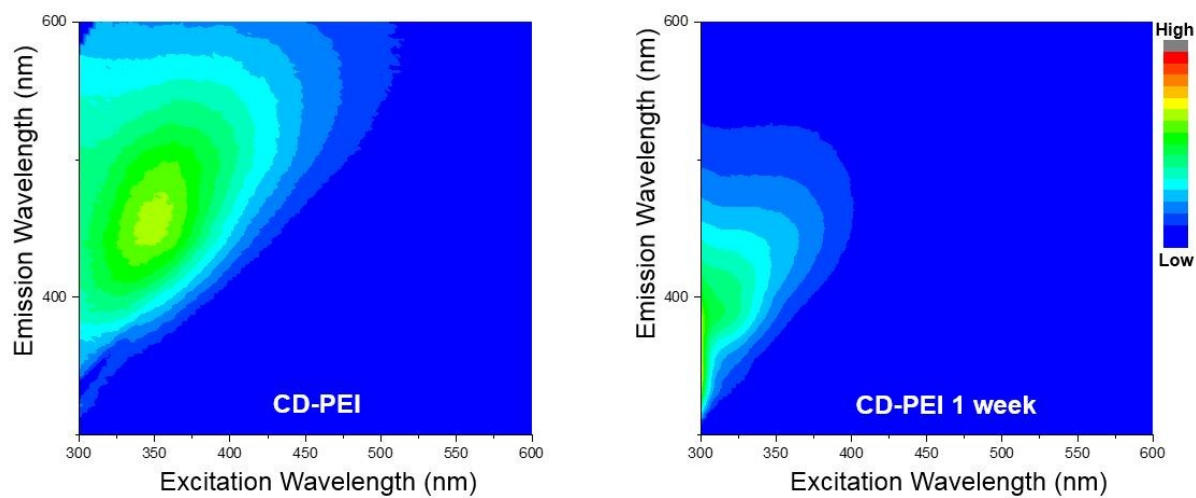

**Figure S7.** Normalized Excitation-Emission 2D contour for (a) CD-PEI and (b) CD-PEI degraded in presence of lipase for 1 week.

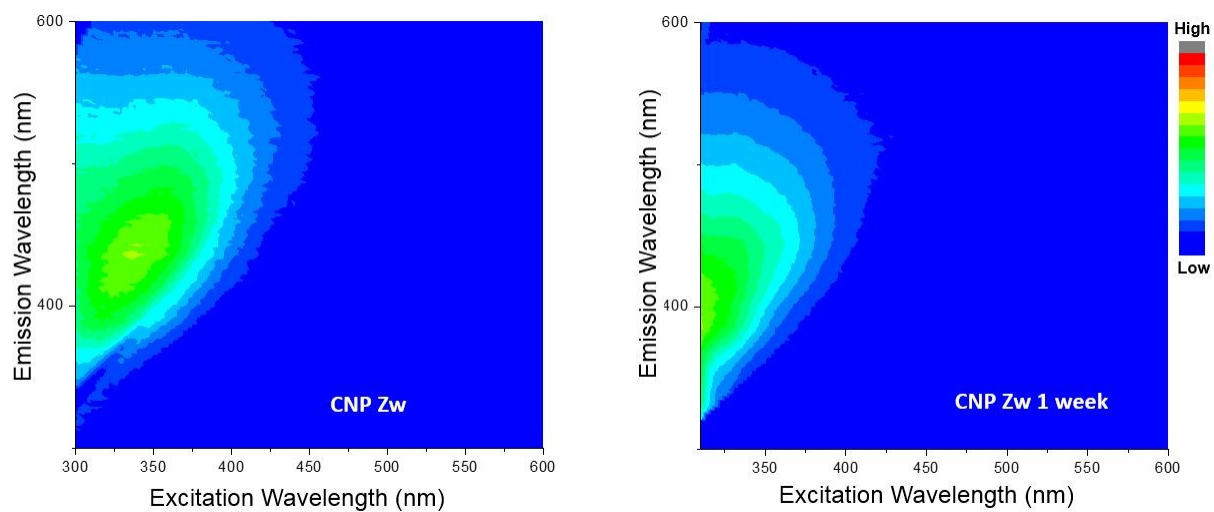

**Figure S8.** Normalized Excitation-Emission 2D contour for (a) CD-Lipid and (b) CD-Lipid degraded in presence of lipase for 1 week

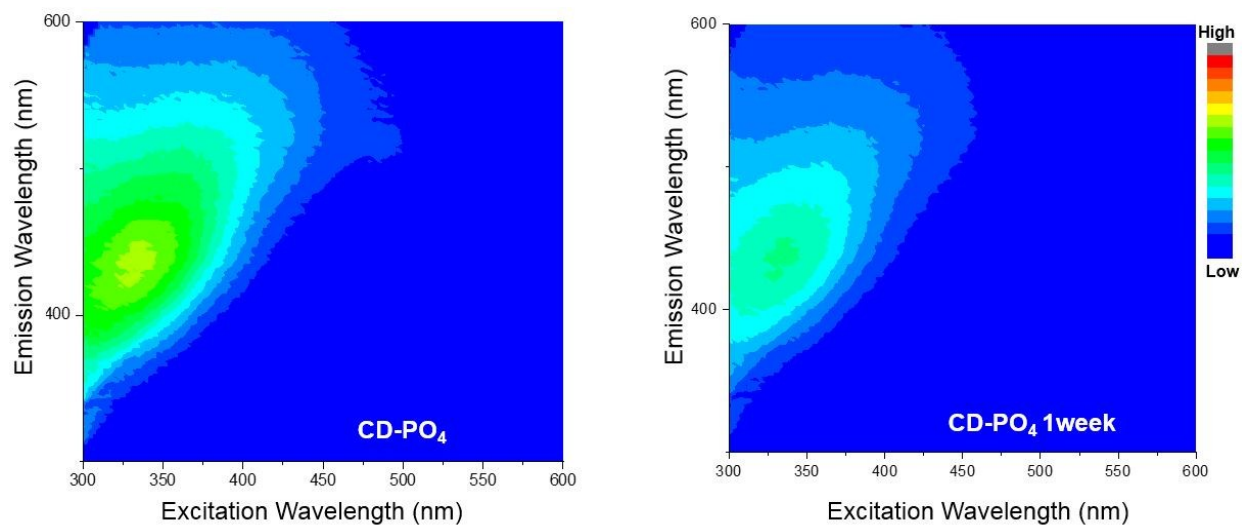

**Figure S9.** Normalized Excitation-Emission 2D contour for (a) CD-PO<sub>4</sub> and (b) CD-PO<sub>4</sub> degraded in presence of lipase for 1 week

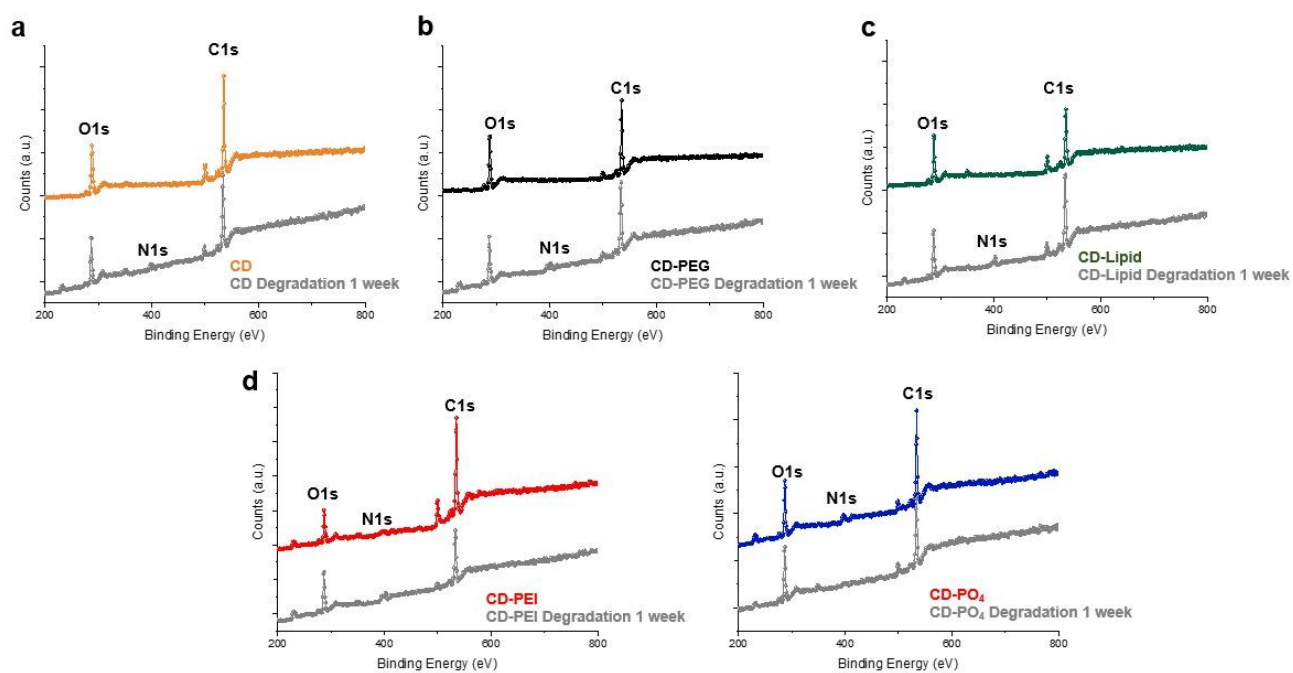

**Figure S10.** X-ray photoelectron spectroscopy (XPS) measurements of all CDs before, and after lipase-mediated degradation for 1 week.

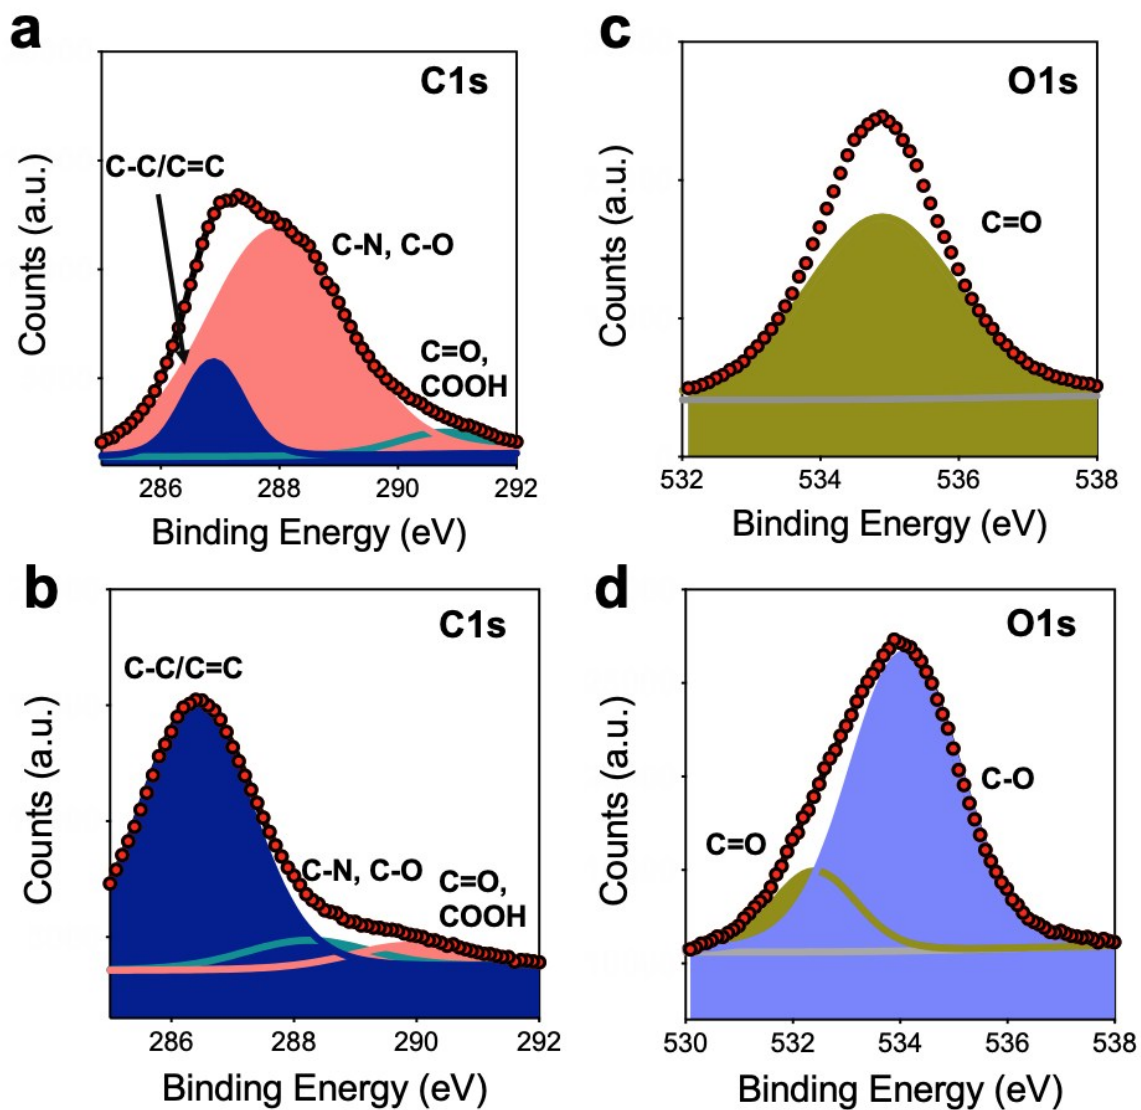

**Figure S11.** XPS narrow scan regions for (a, b) C1s and (c, d) O1s (with specific positions of signal from different bonds present, before and after lipase-mediated degradation of CD).

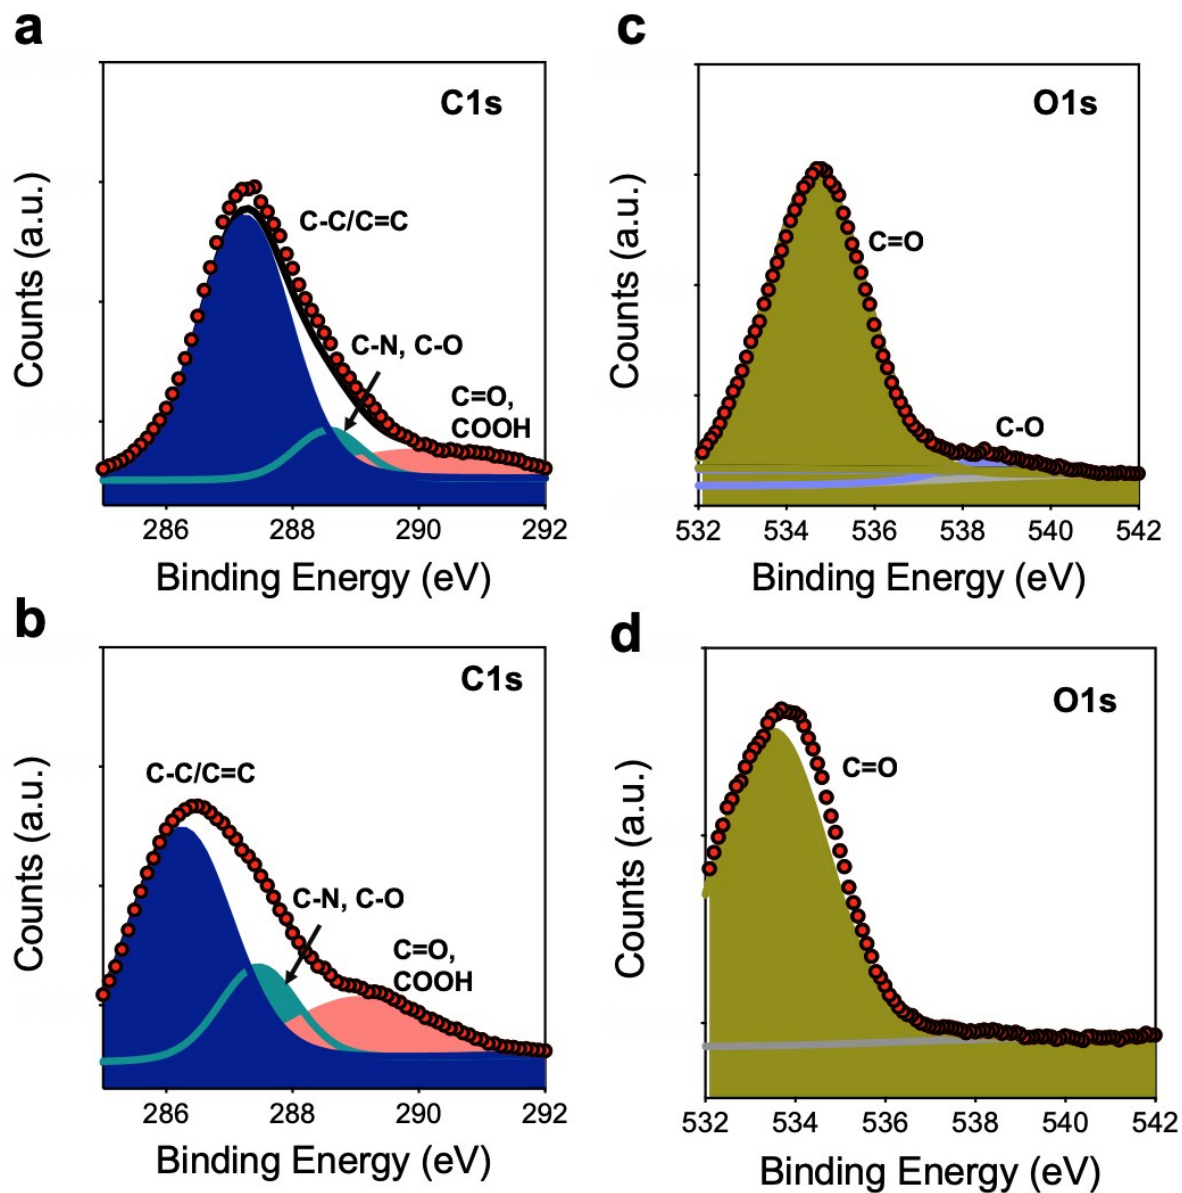

**Figure S12.** XPS narrow scan regions for (a, b) C1s and (c, d) O1s (a, c) C1s and (b, d) O1s with specific positions of signal from different bonds present, before and after lipase-mediated degradation of CD-Lipid.

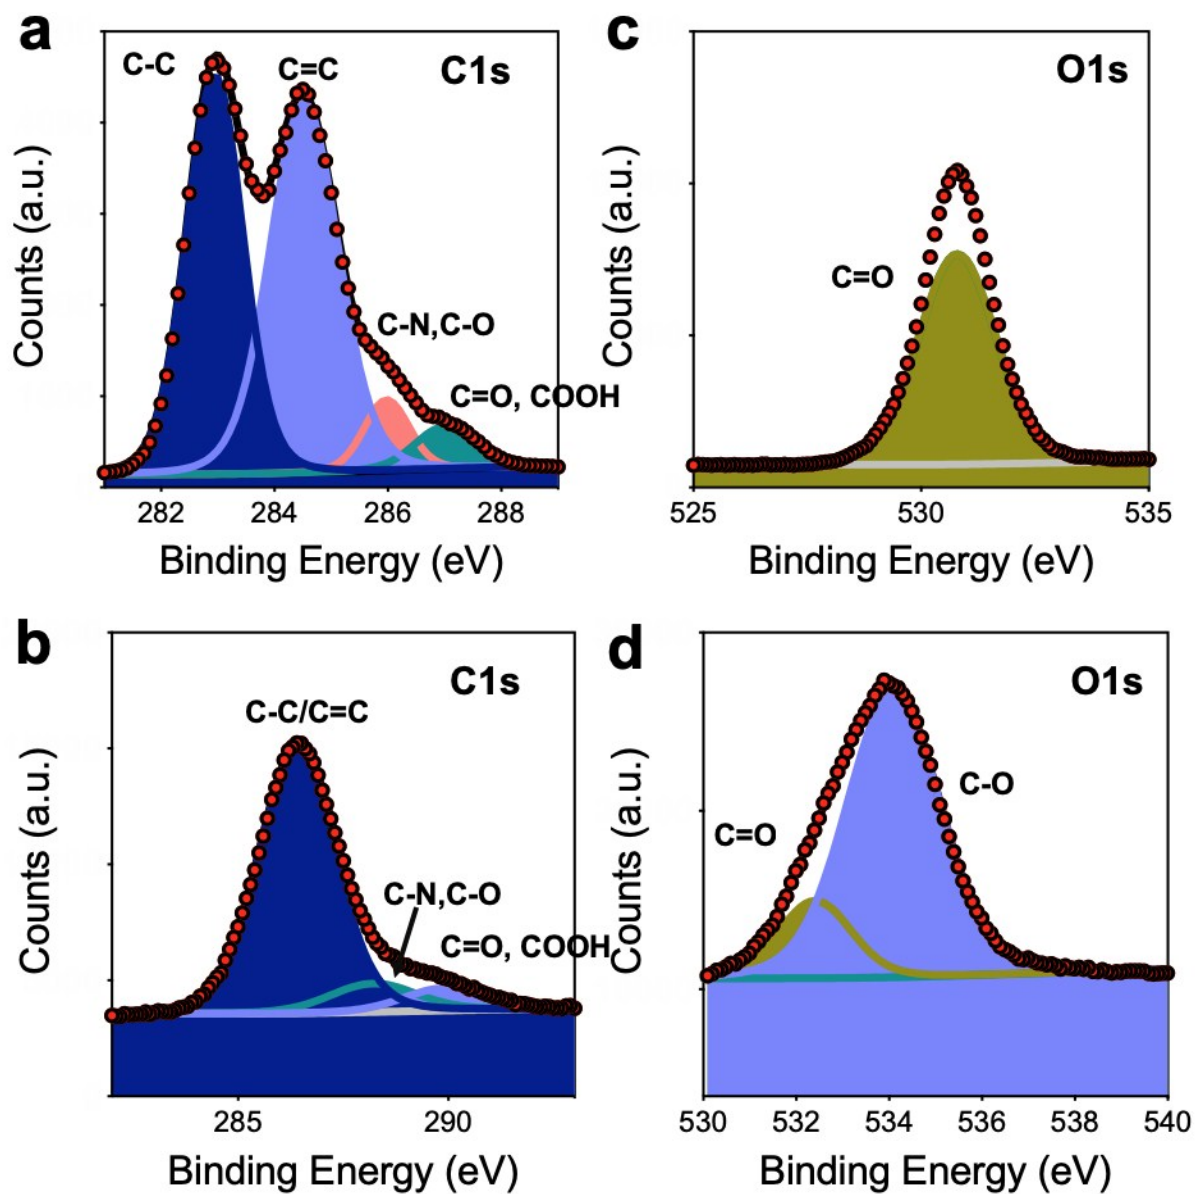

**Figure S13.** XPS narrow scan regions for (a, b) C1s and (c,d) O1s with specific positions of signal from different bonds present, before and after lipase-mediated degradation of CD-PEG.

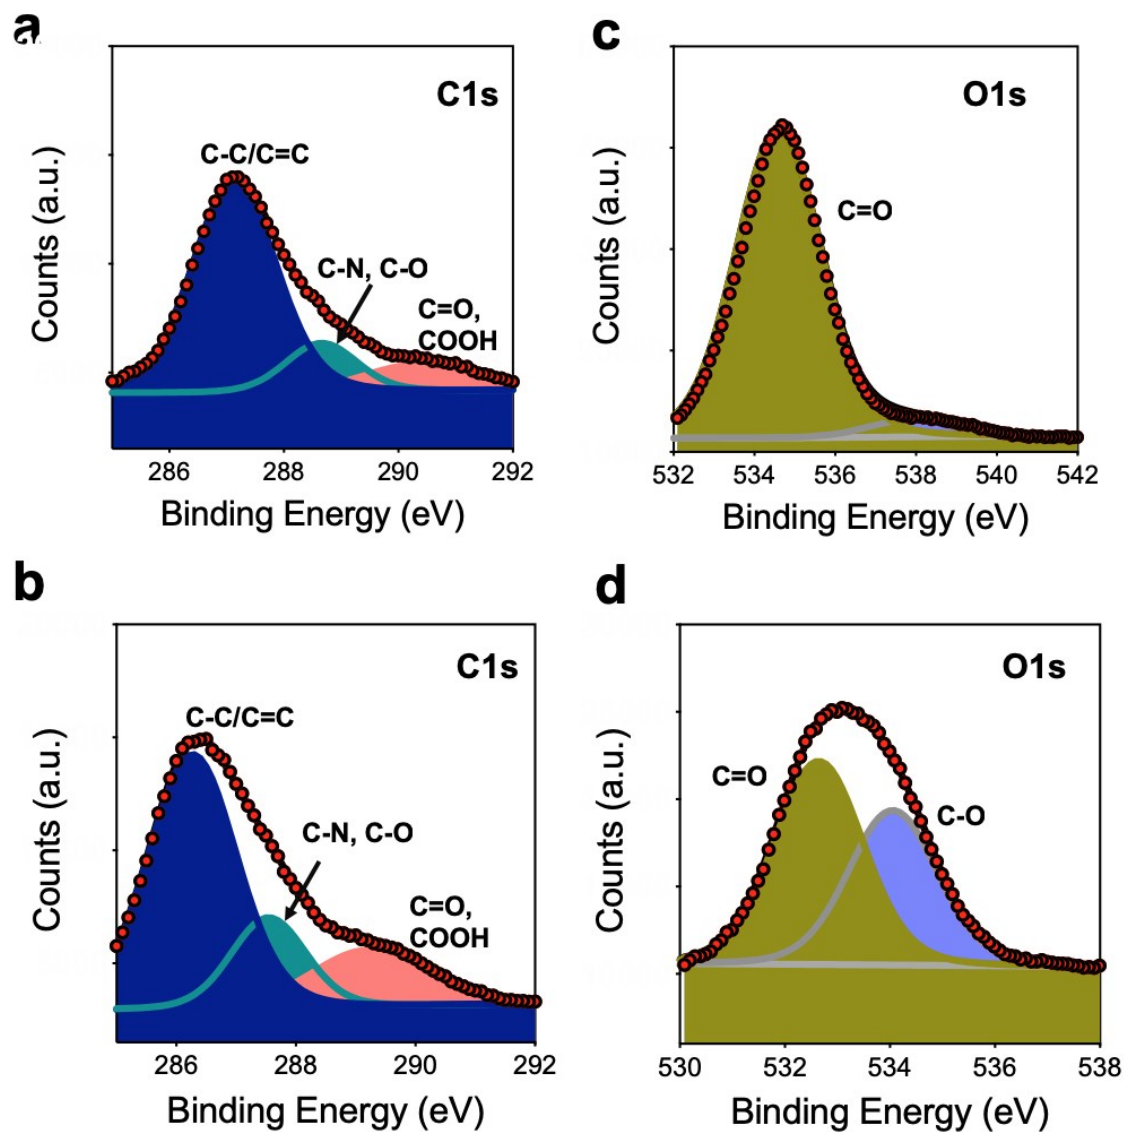

**Figure S14.** XPS narrow scan regions for (a, b) C1s and (c, d) O1s with specific positions of signal from different bonds present, before and after lipase-mediated degradation of CD-PEI.



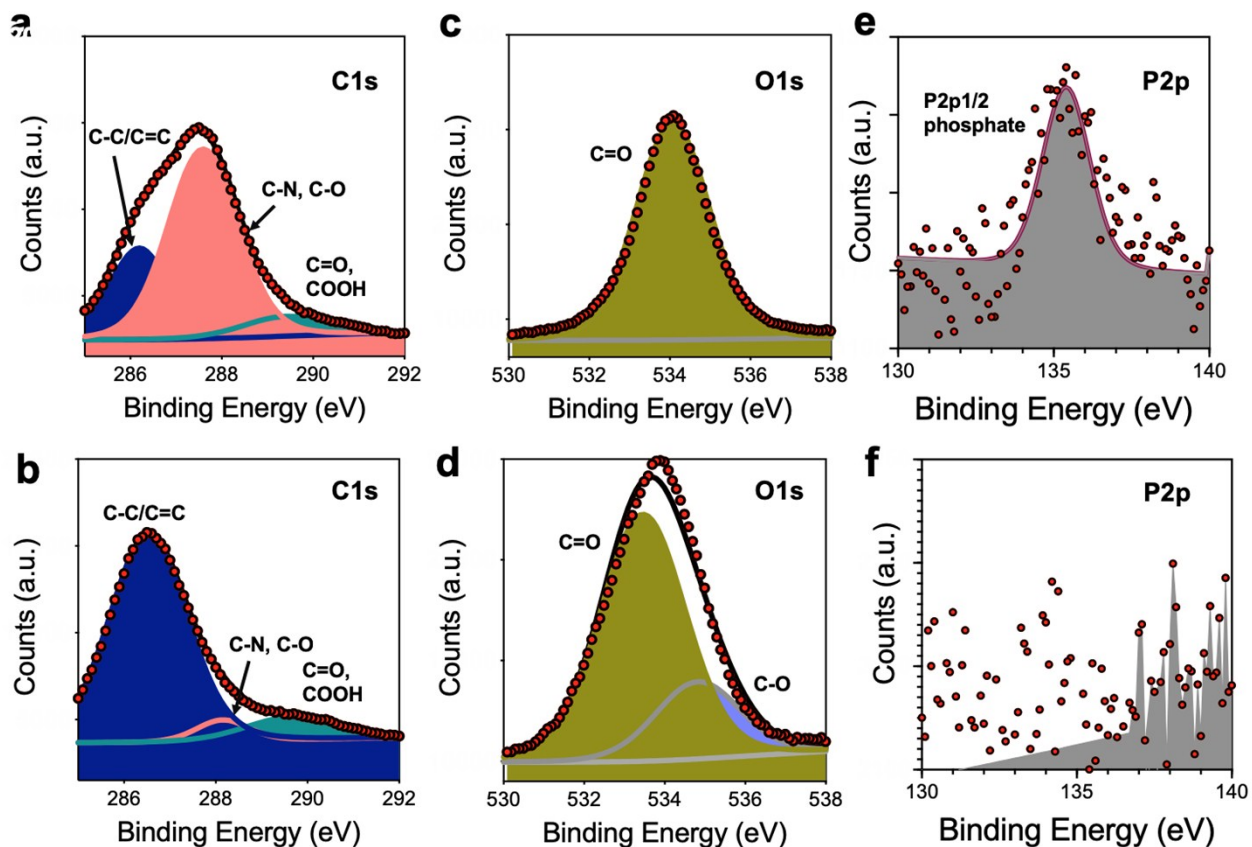

**Figure S15.** XPS narrow scan regions for (a, b) C1s, (c, d) O1s and (e, f) P2p with specific positions of signal from different bonds present, before and after lipase-mediated degradation of CD-PO<sub>4</sub>.

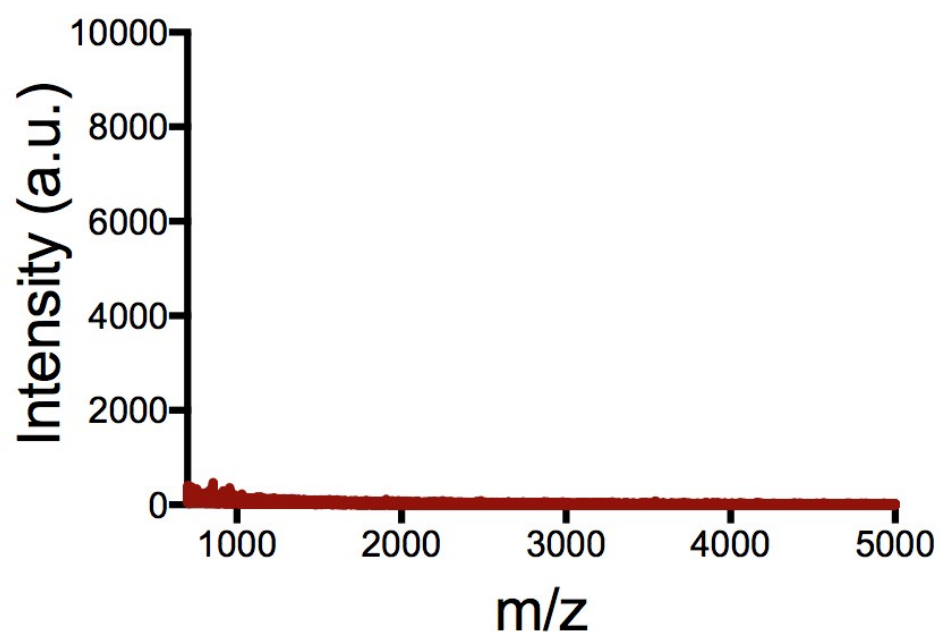

**Figure S16.** MALDI-TOF spectra of lipase enzyme in DI water.

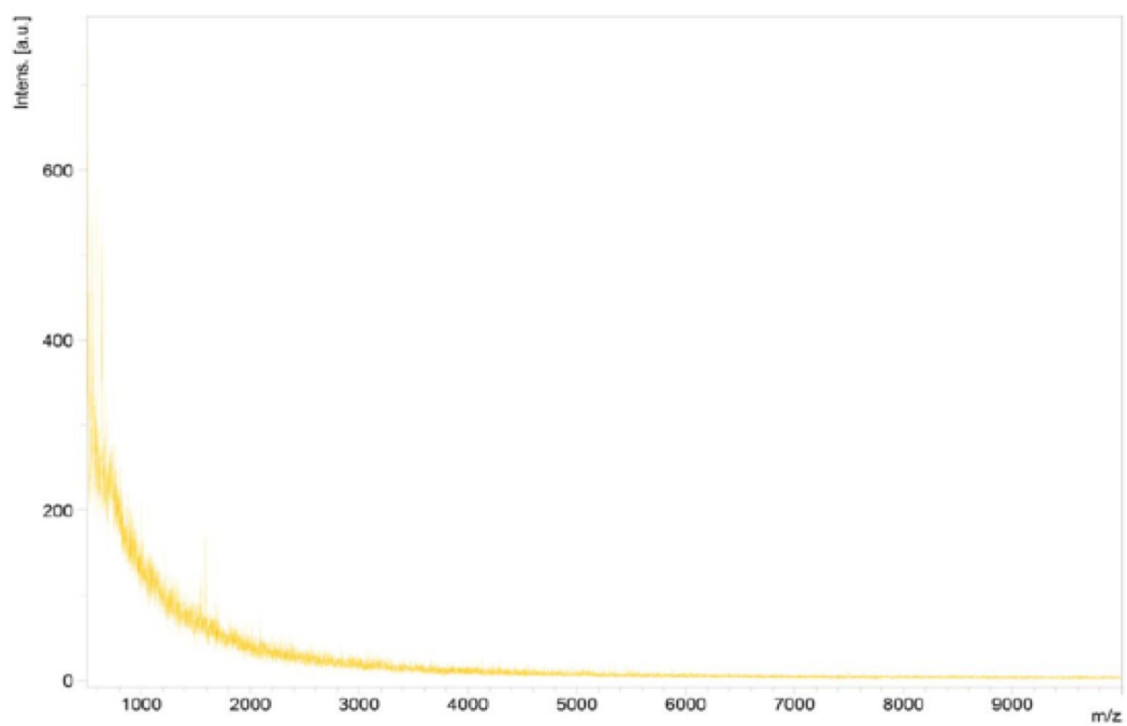

**Figure S17.** MALDI-TOF spectra of CD-Bare.

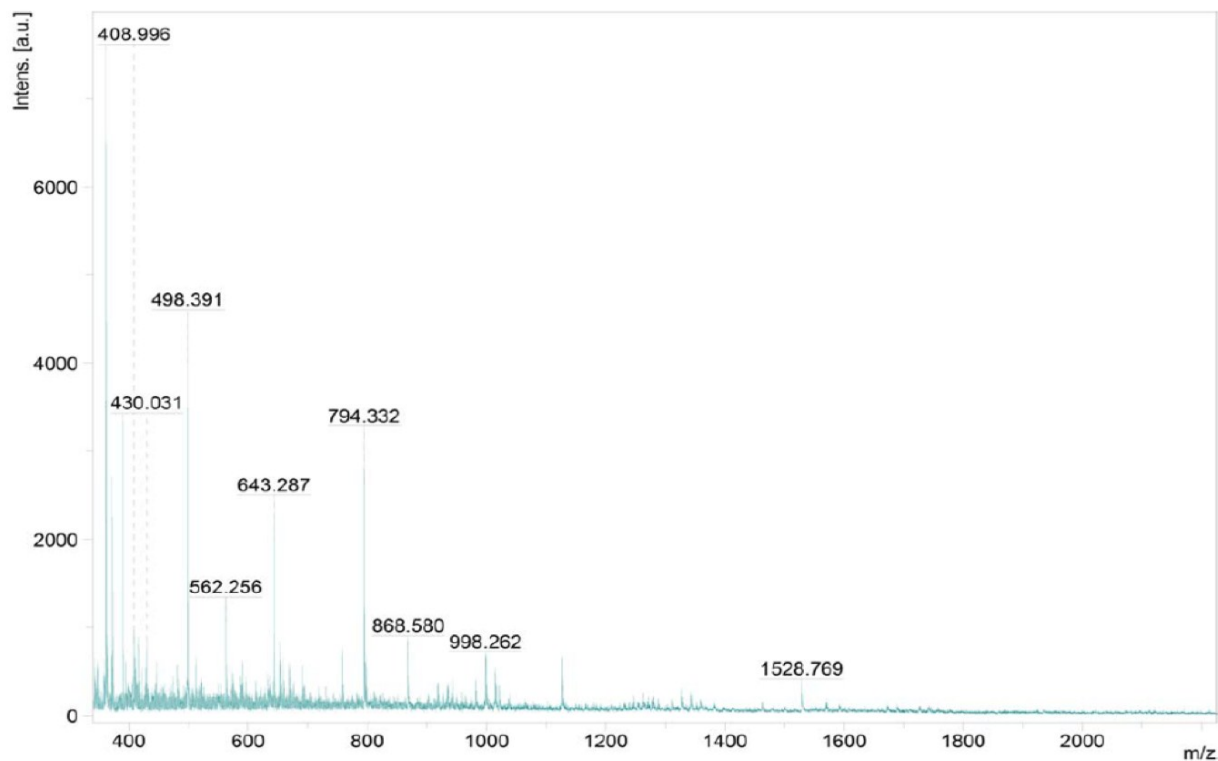

Explanation of peaks based on oxidation scheme:

$$(308 \times 2) + 176 + 2H^+ = 794$$

$$340 + 308 + 176 + 126 + 46 + 2H^+ = 998$$

$$340 + 308 + 176 + (3 \times 126) + (2 \times 116) + (2 \times 46) + 2H^+ = 1528$$

**Figure S18.** MALDI-TOF spectra of CD degraded for 24h with corresponding oxidation scheme for degraded fragments.

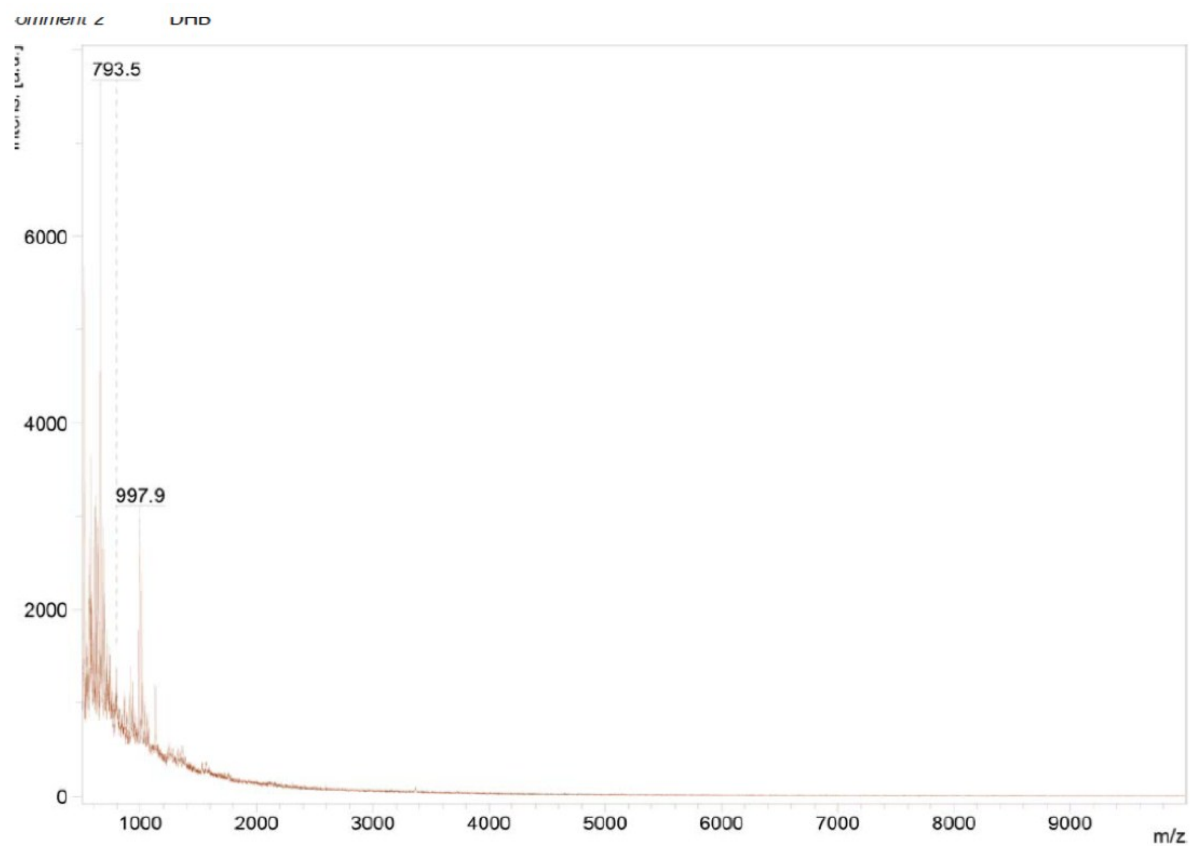

Explanation of peaks based on oxidation scheme:

$$(308 \times 2) + 176 + 1H^+ = 793$$

$$308 + (2 \times 170) + 176 + 126 + 46 + 1H^+ = 997$$

**Figure S19.** MALDI-TOF spectra of CD degraded for 1 week with corresponding oxidation scheme for degraded fragments.

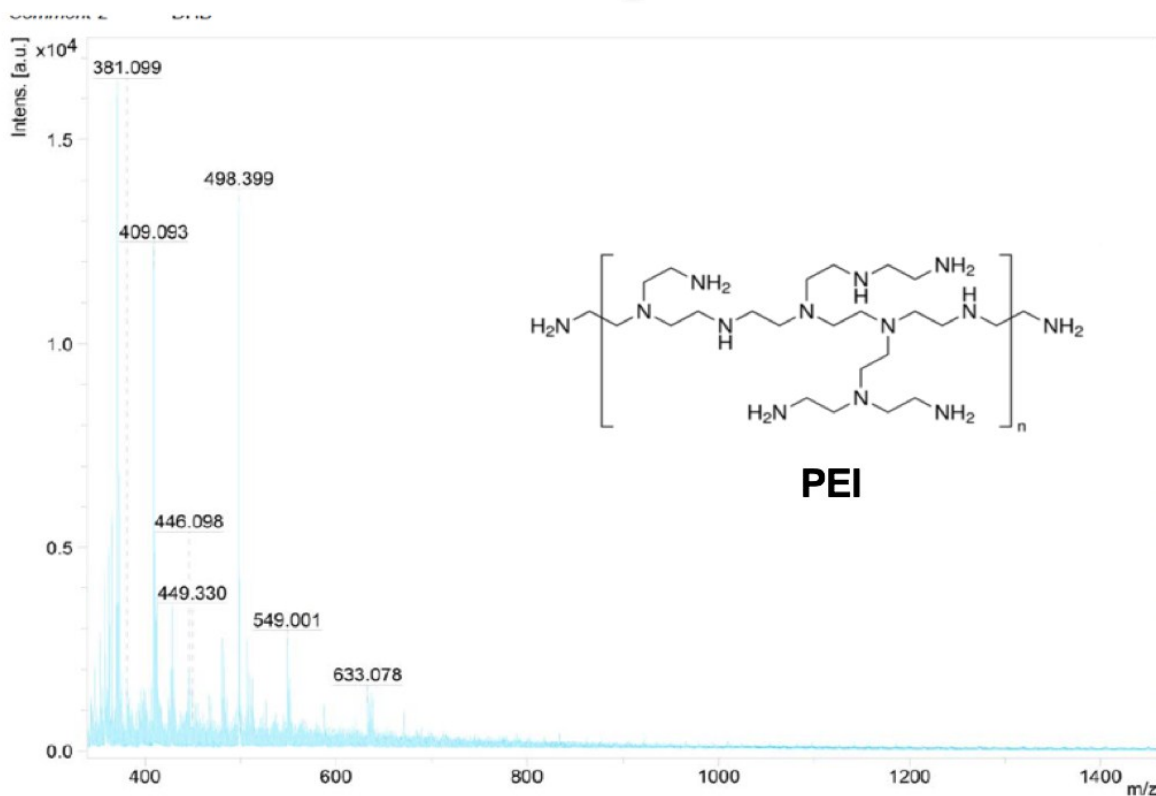

Explanation of peaks:

$$176 + 232 + 1\text{H}^+ = 409$$

$$170 + 275 + 1\text{H}^+ = 446$$

$$162 + 275 + 2\text{H}^+ = 449$$

$$178 + 318 + 2\text{H}^+ = 498$$

232, 275 and 318 are fractions of PEI

**Figure S20.** MALDI-TOF spectra of CD-PEI with corresponding peaks being assigned.

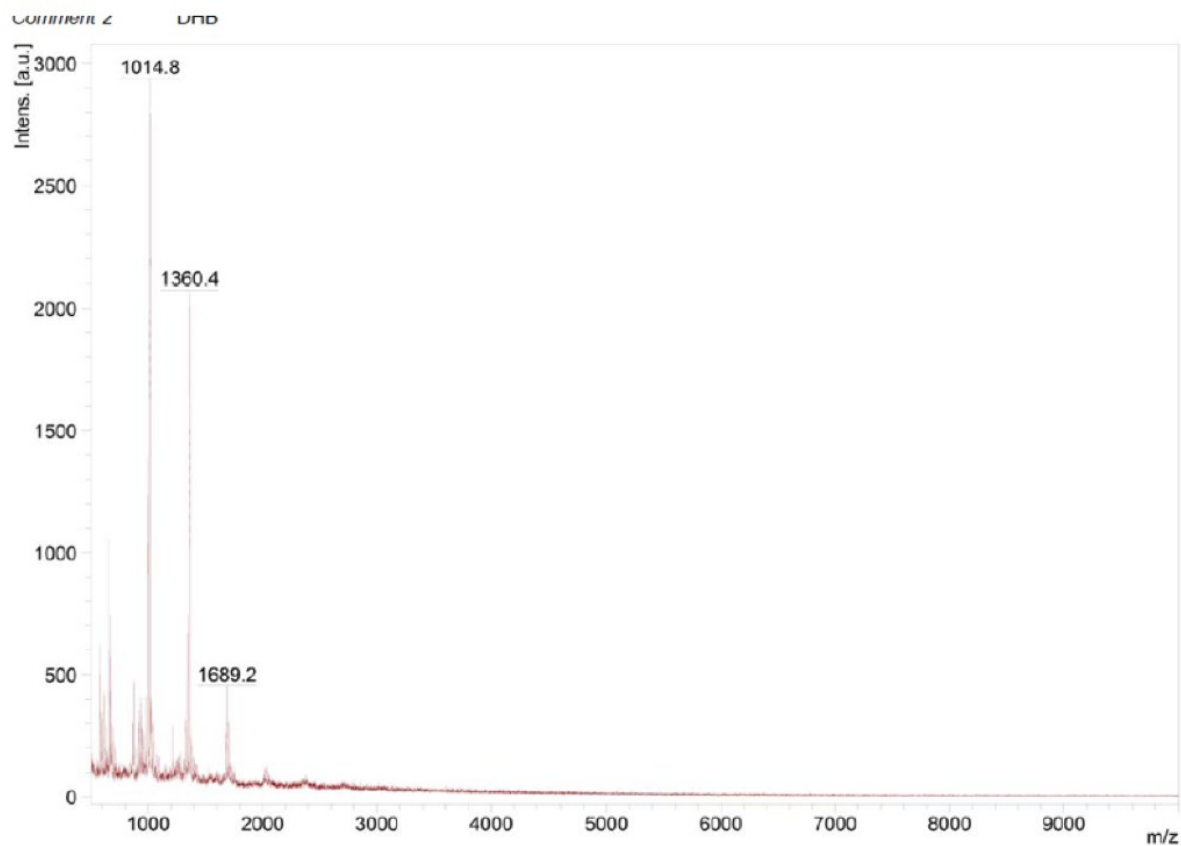

Explanation of peaks based on oxidation scheme:

$$174 + 490 + (3 \times 116) + 1\text{H}^+ = 1014$$

$$174 + 490 + (4 \times 116) + (5 \times 46) + 2\text{H}^+ = 1360$$

$$170 + 490 + (5 \times 116) + (7 \times 46) + 126 + 1\text{H}^+ = 1689$$

**Figure S21.** MALDI-TOF spectra of CD-PEI degraded for 24h with corresponding oxidation scheme for degraded fragments.

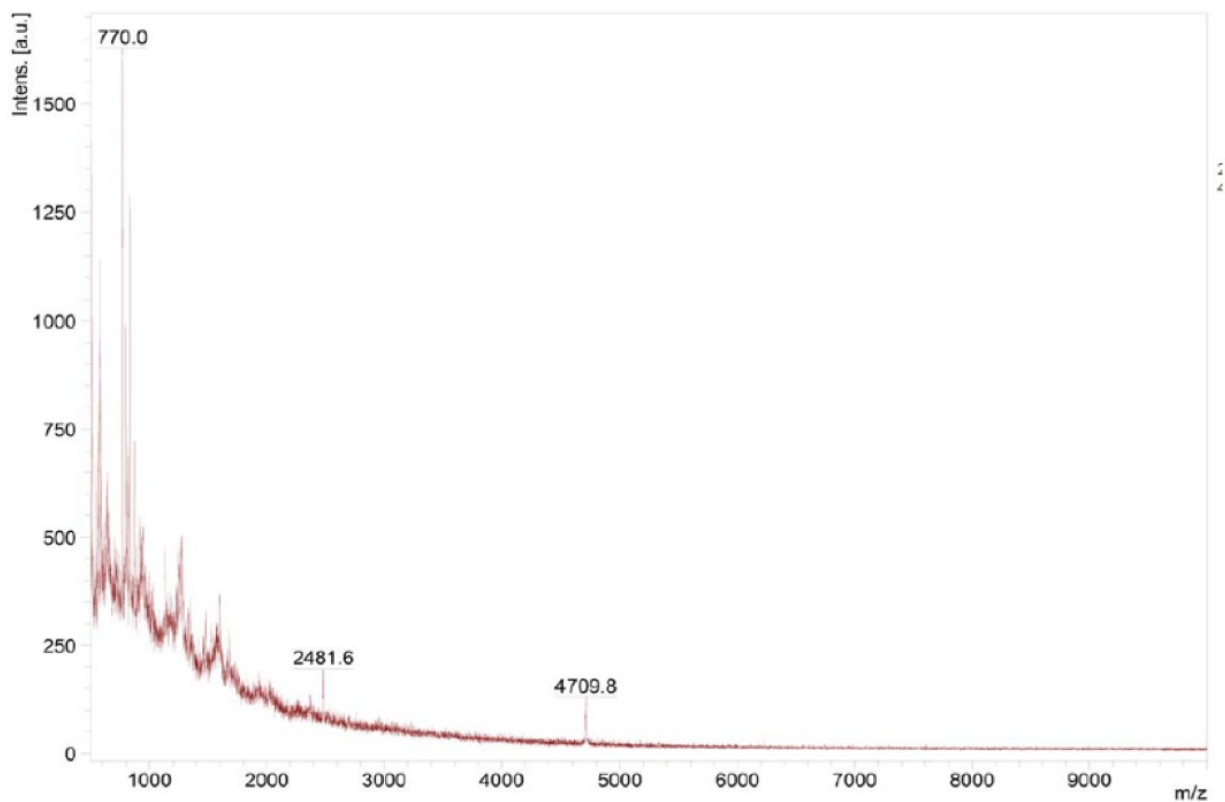

Explanation of peaks based on oxidation scheme:

$$162 + 490 + 116 + 2H^+ = 770$$

$$174 + 490 + 533 + (6 \times 116) + (10 \times 46) + 126 + 2H^+ = 2481$$

**Figure S22.** MALDI-TOF spectra of CD-PEI degraded for 1 week with corresponding oxidation scheme for degraded fragments.



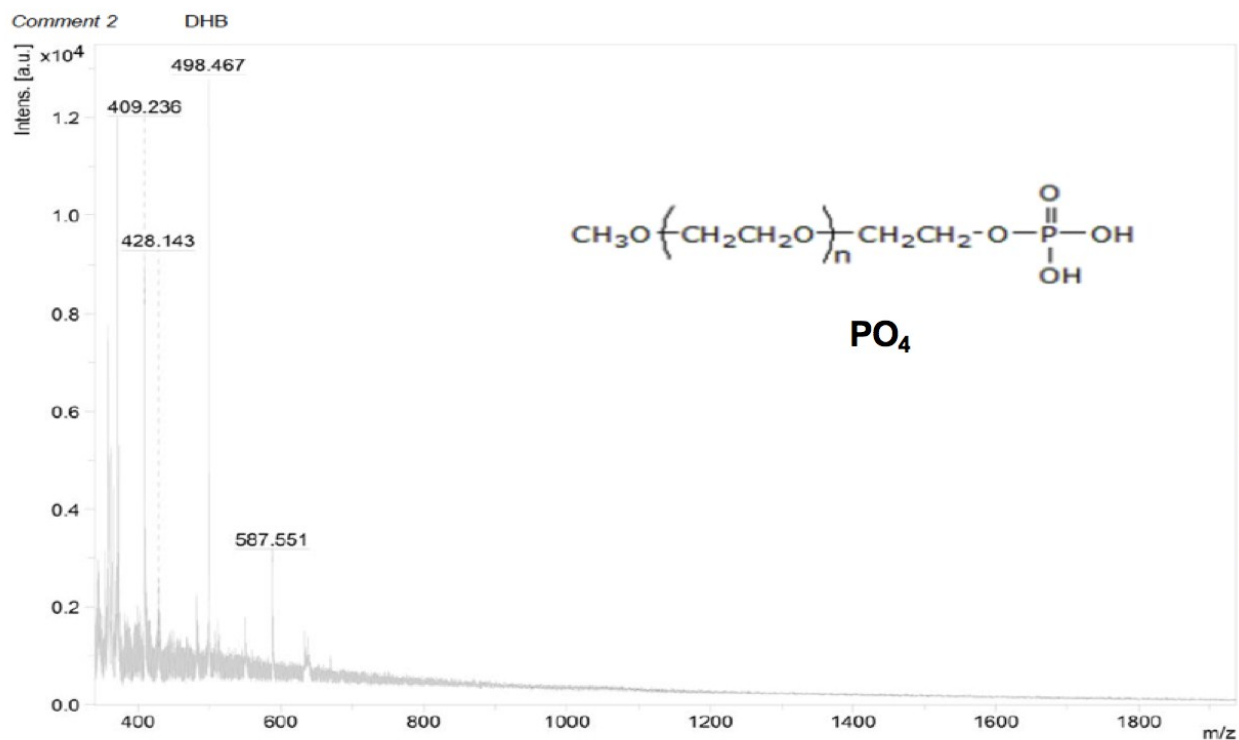

Explanation of peaks:

$$200 + 170 + \text{K}^+ = 409$$

$$200 + 44 + 172 + 170 + 1\text{H}^+ = 587$$

44 is the repeating unit

**Figure S23.** MALDI-TOF spectra of CD- $\text{PO}_4$  with corresponding peaks being assigned.

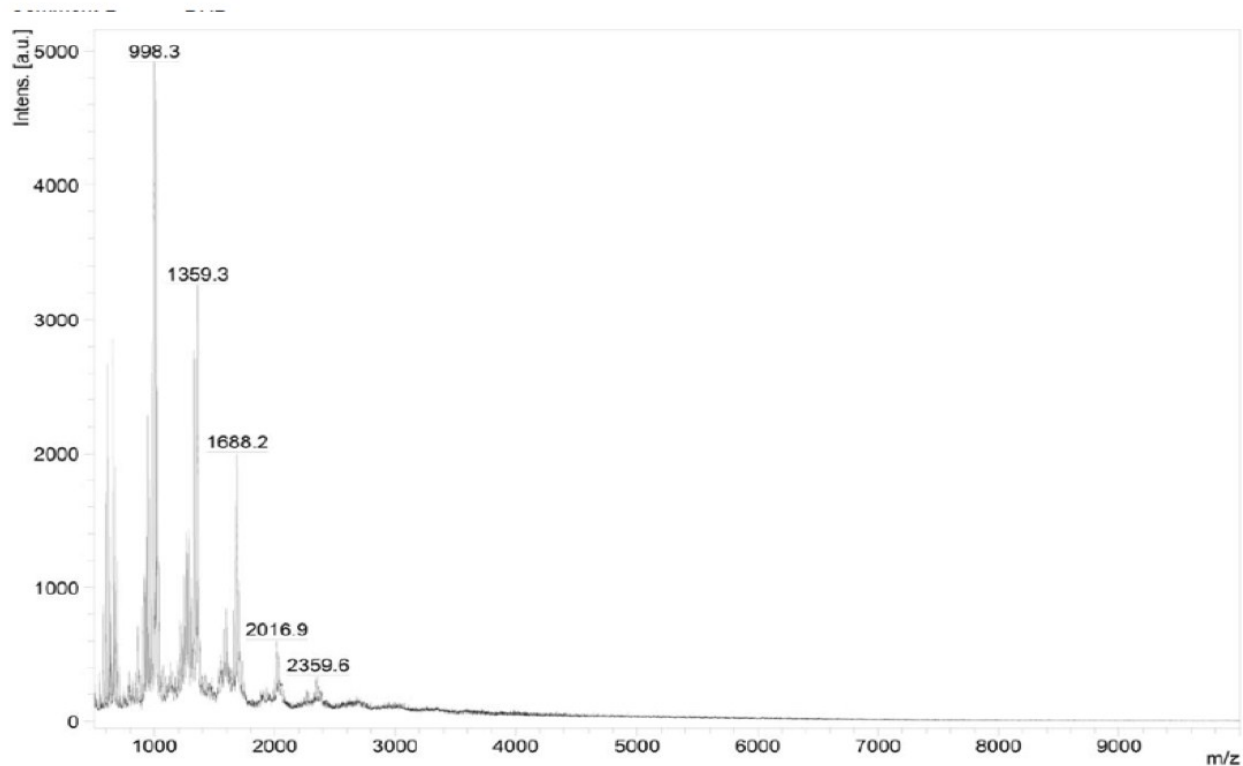

Explanation of peaks based on oxidation scheme:

$$176 + 200 + 44 + (2 \times 126) + (2 \times 116) + (2 \times 46) + 2H^+ = 998$$

$$170 + (2 \times 126) + (4 \times 116) + (4 \times 46) + 200 + (2 \times 44) + 1H^+ = 1359$$

$$178 + (2 \times 126) + (3 \times 116) + (2 \times 46) + 200 + (14 \times 44) + 2H^+ = 1688$$

$$178 + (2 \times 126) + (5 \times 116) + (6 \times 46) + 200 + (12 \times 44) + 2H^+ = 2016$$

**Figure S24.** MALDI-TOF spectra of CD-PO<sub>4</sub> degraded for 24h with corresponding oxidation scheme for degraded fragments.

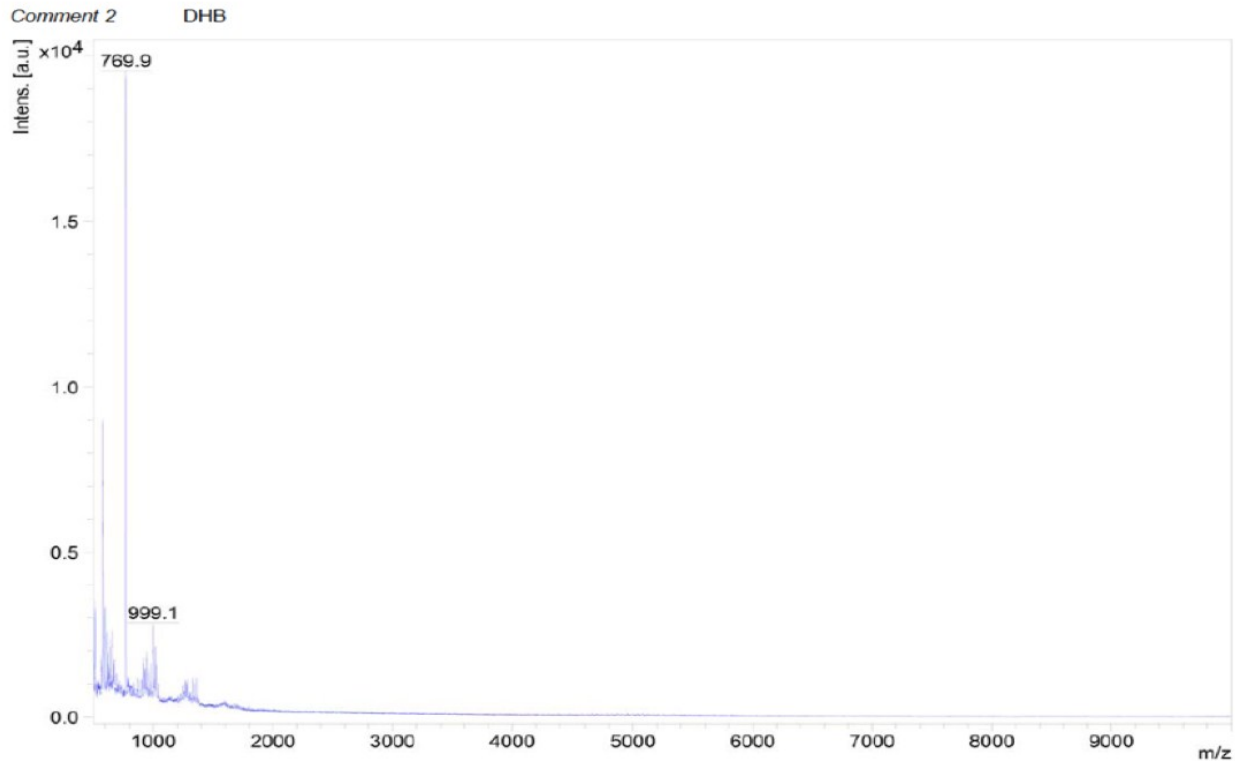

Explanation of peaks based on oxidation scheme:

$$180 + 116 + (4 \times 46) + 200 + (2 \times 44) + 1\text{H}^+ = 769$$

$$176 + (2 \times 126) + (2 \times 116) + (3 \times 46) + 200 + 1\text{H}^+ = 999$$

**Figure S25.** MALDI-TOF spectra of CD-PO<sub>4</sub> degraded for 1 week with corresponding oxidation scheme for degraded fragments.

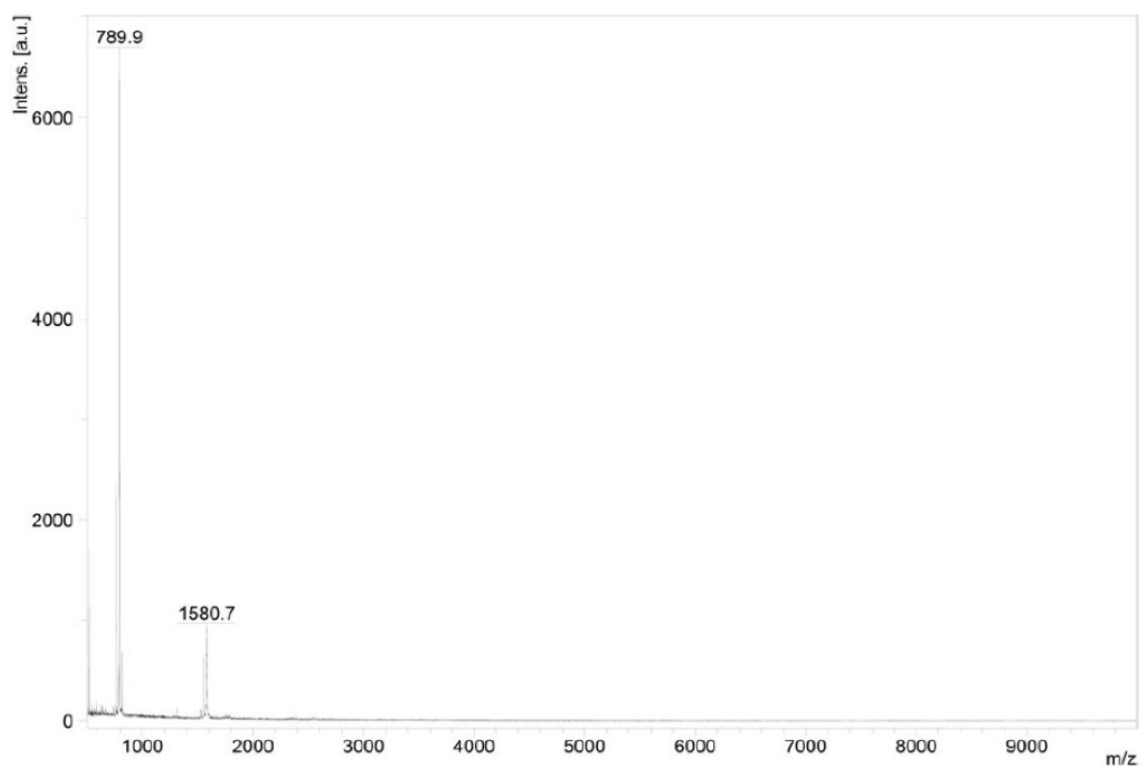

**Figure S26.** MALDI-TOF spectra of CD-Lipid.

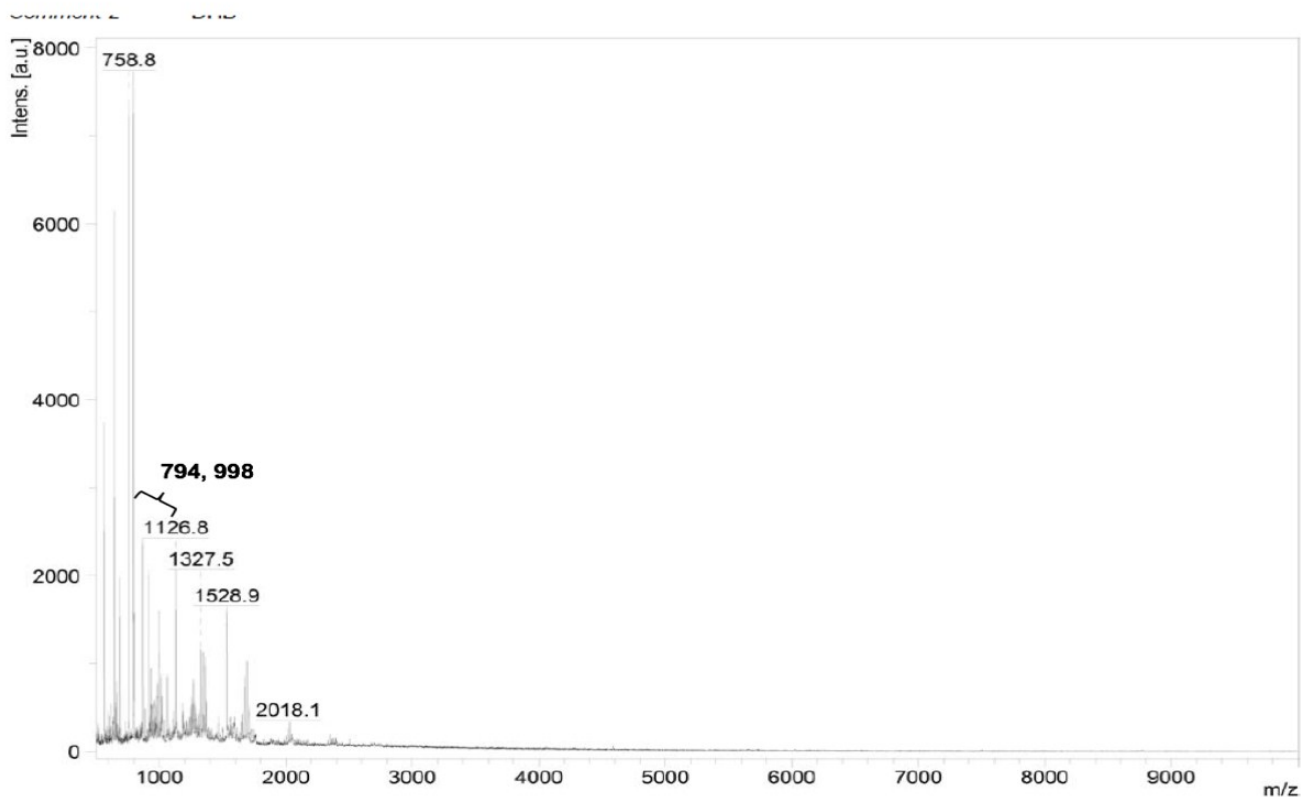

Explanation of peaks based on oxidation scheme:

$$(308 \times 2) + 176 + 2H^+ = 794$$

$$340 + 308 + 176 + 126 + 46 + 2H^+ = 998$$

$$340 + 308 + 176 + (3 \times 126) + (2 \times 116) + (2 \times 46) + 2H^+ = 1528$$

**Figure S27.** MALDI-TOF spectra of CD-Lipid degraded for 24h with corresponding oxidation scheme for degraded fragments.

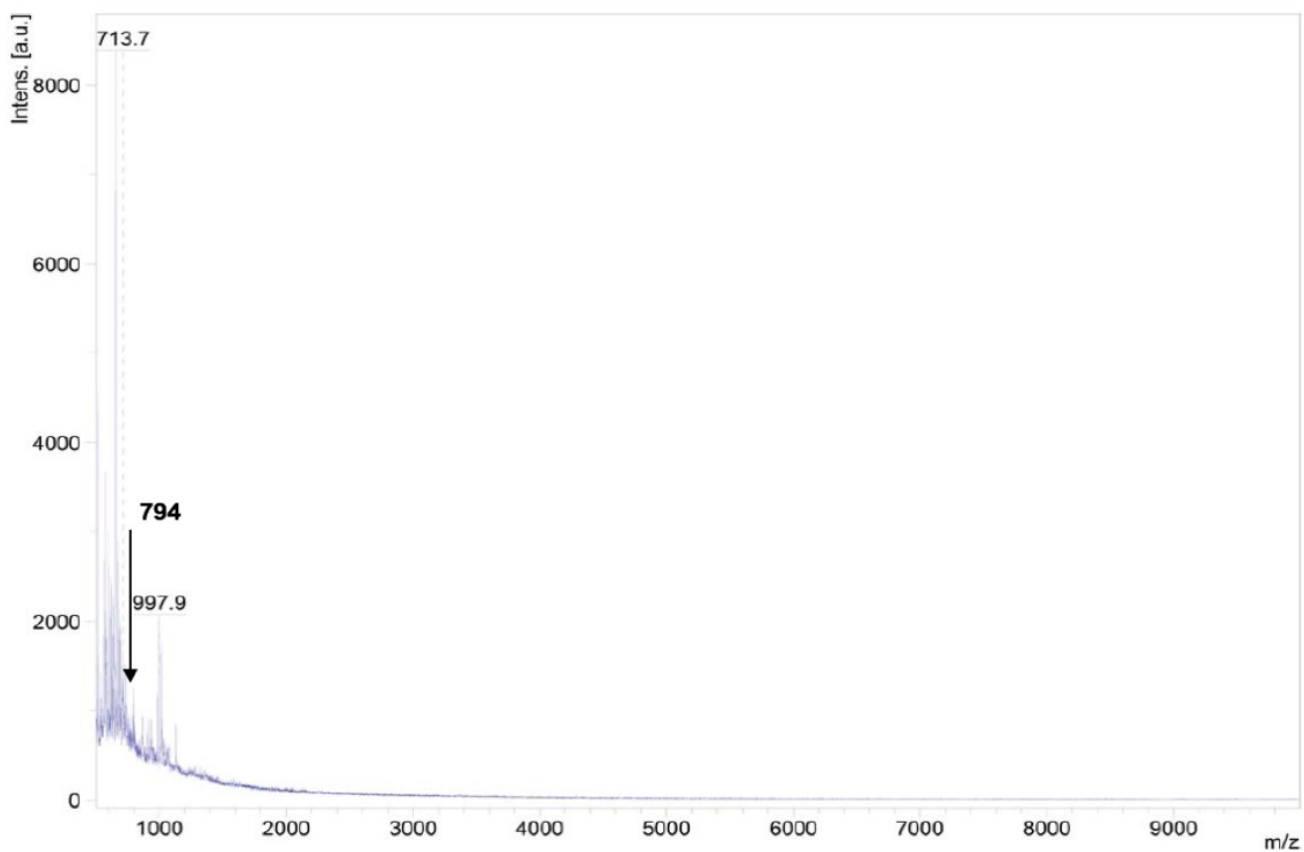

Explanation of peaks based on oxidation scheme:

$$(308 \times 2) + 176 + 2H^+ = 794$$

$$340 + 308 + 176 + 126 + 46 + 2H^+ = 998$$

**Figure S28.** MALDI-TOF spectra of CD-Lipid degraded for 1 week with corresponding oxidation scheme for degraded fragments.

| <b>Samples</b>           | <b>C (%)</b> | <b>N (%)</b> | <b>O (%)</b> | <b>P (%)</b> |
|--------------------------|--------------|--------------|--------------|--------------|
| CD                       | 67.03        | -            | 32.97        | -            |
| CD degraded 1 week       | 66.44        | 0.76         | 32.83        | -            |
| CD-PEG                   | 74.47        | -            | 25.53        | -            |
| CD-PEG degraded 1 week   | 67.79        | 0.88         | 31.33        | -            |
| CD-PEI                   | 51.94        | 2.47         | 45.59        | -            |
| CD-PEI degraded 1 week   | 61.77        | 13.29        | 24.93        | -            |
| CD-Lipid                 | 72.97        | 1.01         | 26.02        | -            |
| CD-Lipid degraded 1 week | 65.39        | 4.37         | 30.24        | -            |
| CD-PO4                   | 64.06        | 7.69         | 28.25        | -            |
| CD-PO4 degraded 1 week   | 71.99        | -            | 28.01        | -            |

**Table S1.** Atomic percentages of CDs before and after subjecting to lipase-mediated biodegradation process.
